# Supplementary material
Source: publisher figshare collection journal article supplement (https://acs.figshare.com/ndownloader/files/4357786)
Supplement: Supplementary file 1 [file 4357786]

## Supplementary data

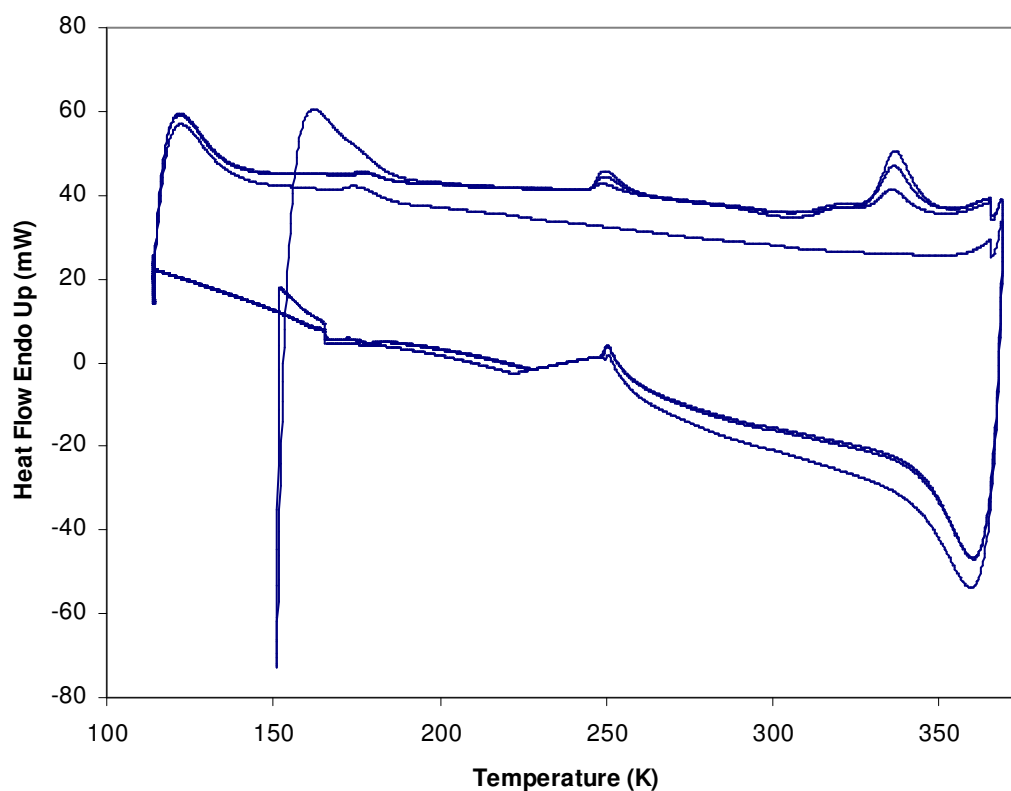

Figure S1. DSC trace of sublimed  $\text{SnMe}_3\text{OH}$

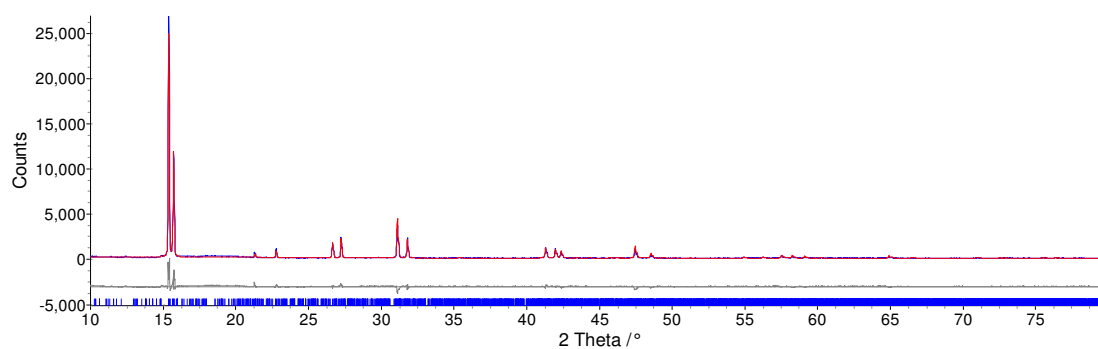

Figure S2. Rietveld fit of 'as received' trimethyltin hydroxide. The  $R_{wp}$  for this refinement was 14.8 %. The figure shows experimental data in blue, calculated pattern in red and difference plot in grey. The predicted reflections arising from this structure are shown in blue at the bottom of the plot.

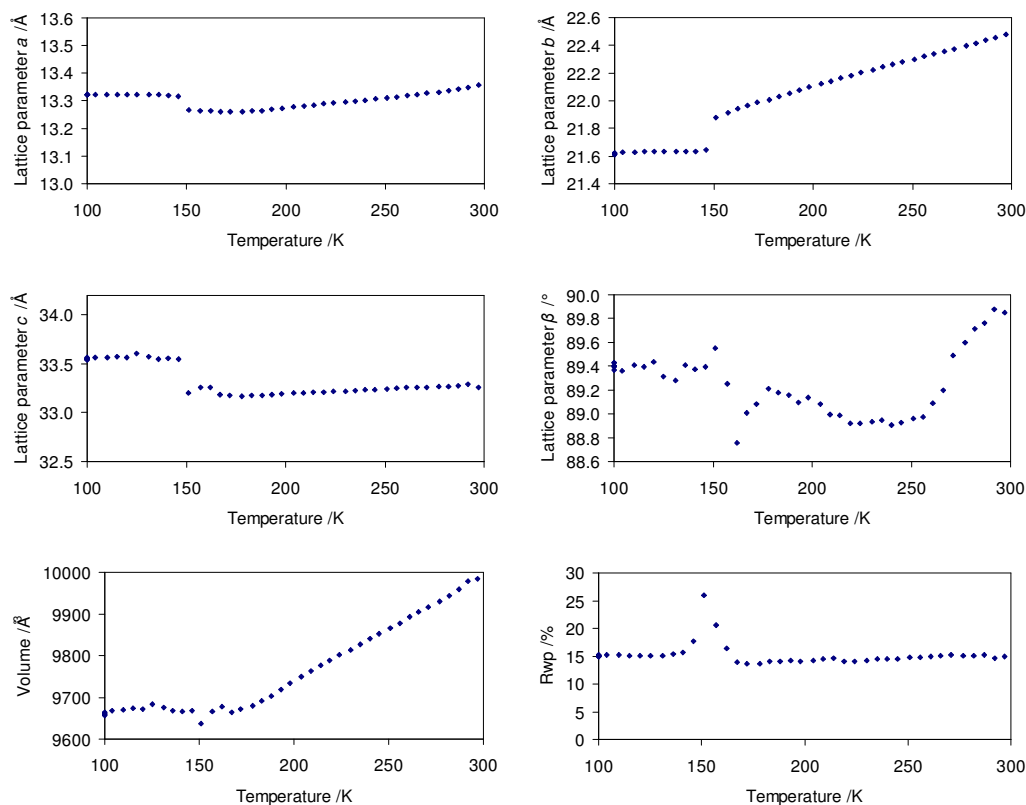

Figure S3. Refined lattice parameters, volume and  $R_{wp}$  values from each of the sequential Rietveld refinements on the data obtained while cooling an ‘as received’ sample of trimethyltin hydroxide from 300 to 100 K. Lattice parameters are shown on an identical % change scale for ease of comparison. A clear first order phase transition is noted at 151 K. The  $R_{wp}$  rises at this transition temperature due to the peaks being “locked in” following the transition and hence the structural model not being able to accurately fit all the data.

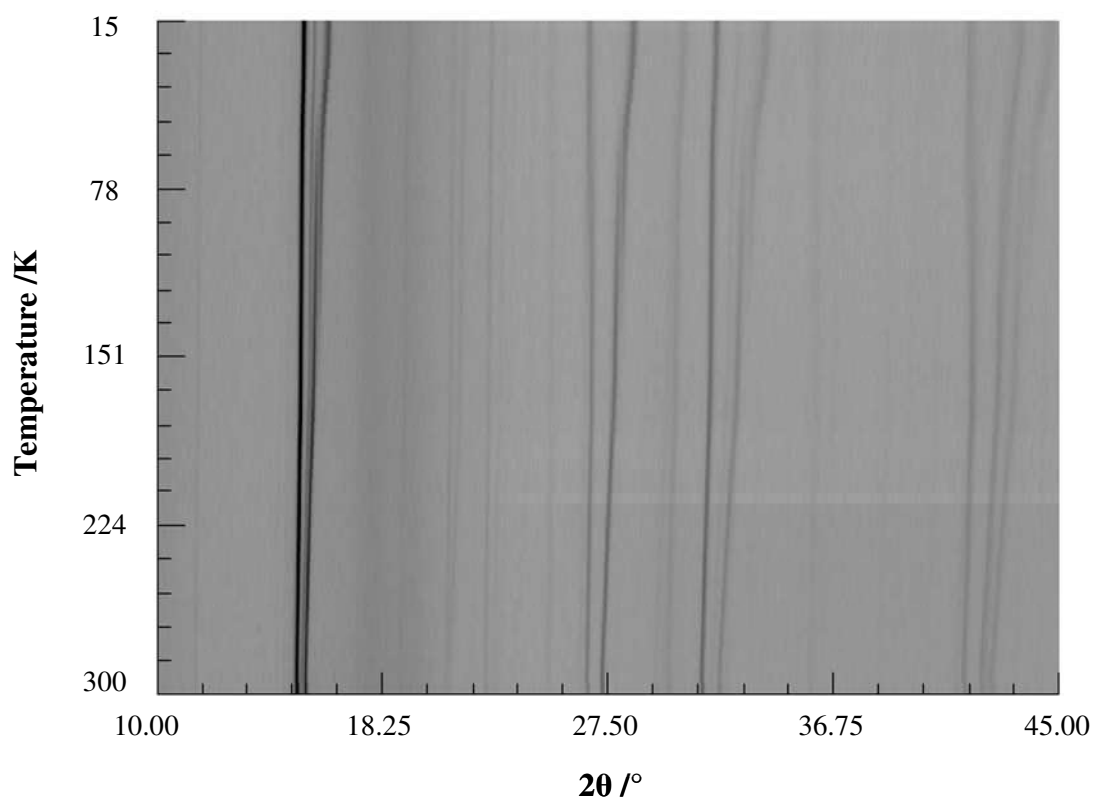

Figure S4. Two dimensional film representation of powder diffraction data recorded while cooling a sample of the vacuum-sublimed trimethyltin hydroxide from 300 to 15 K in  $\sim 5$  K steps. The sharp first order phase transition beginning at *ca.* 141 K corresponding to the change from structure **1** to structure **2** is clearly evident.

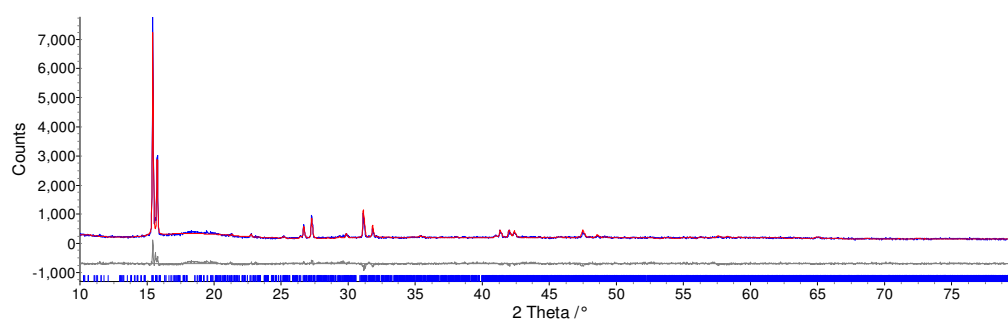

Figure S5. Rietveld fit of sublimed trimethyltin hydroxide. The  $R_{wp}$  for this refinement was 10.02 %. The figure shows experimental data in blue, calculated pattern in red and difference plot in grey. The predicted reflections arising from this structure are shown in blue at the bottom of the plot.

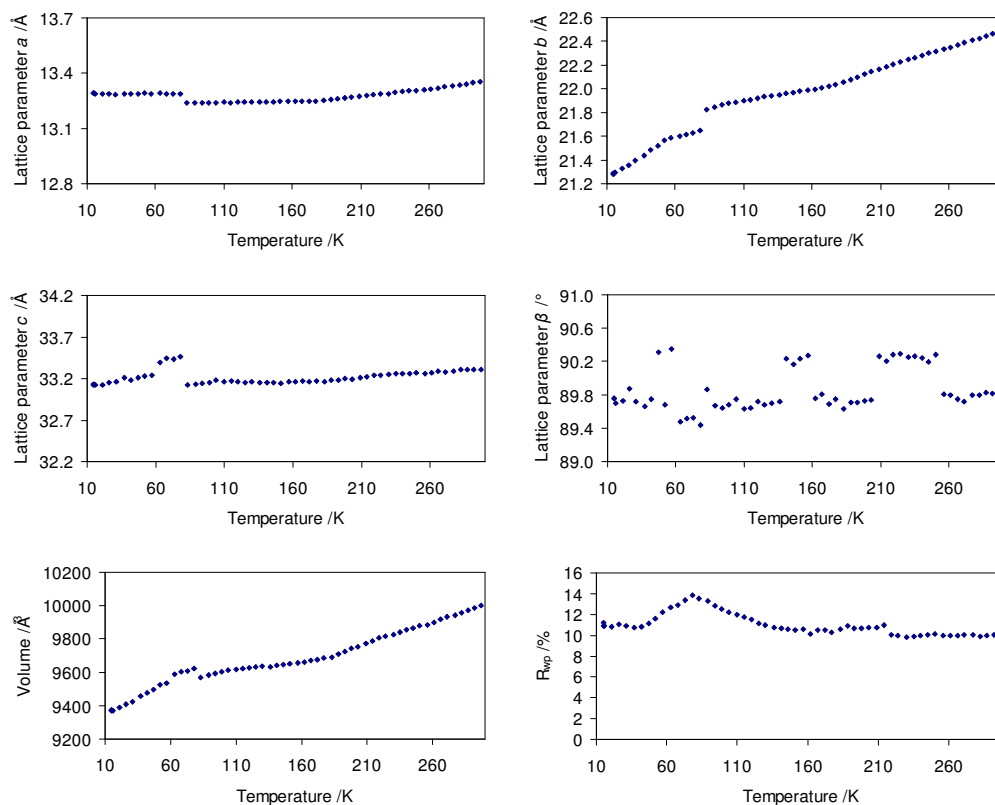

Figure S6. Refined lattice parameters, volume and  $R_{wp}$  values from sequential Rietveld refinements on the data obtained while cooling a sublimed sample of trimethyltin hydroxide from 300 to 12 K. Lattice parameters are shown on an identical A clear first order phase transition is noted at 78 K. More subtle phase transitions are seen at 245 and 177 K in these data. The  $R_{wp}$  rises at the 78 K transition due to the peaks being “locked in” following the transition and hence the structural model does not accurately fit all the data.

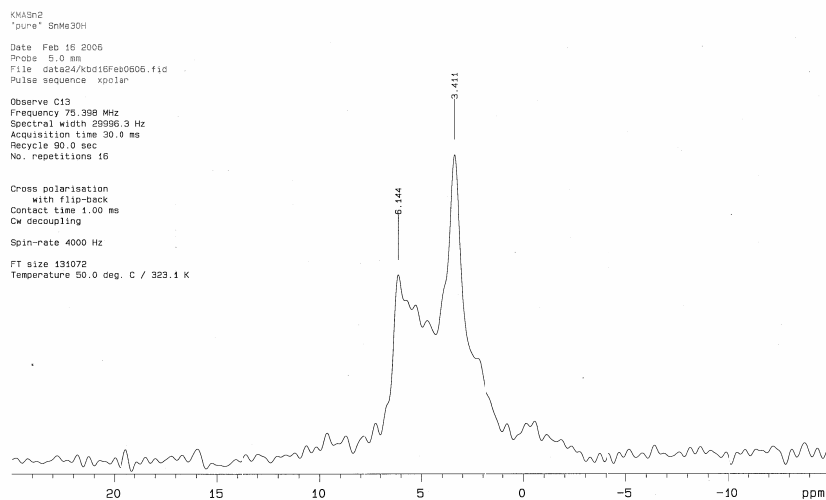

(a)

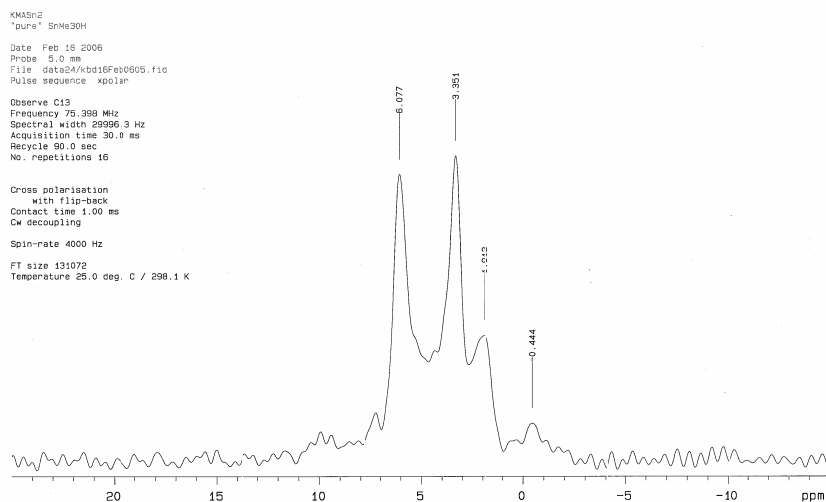

(b)

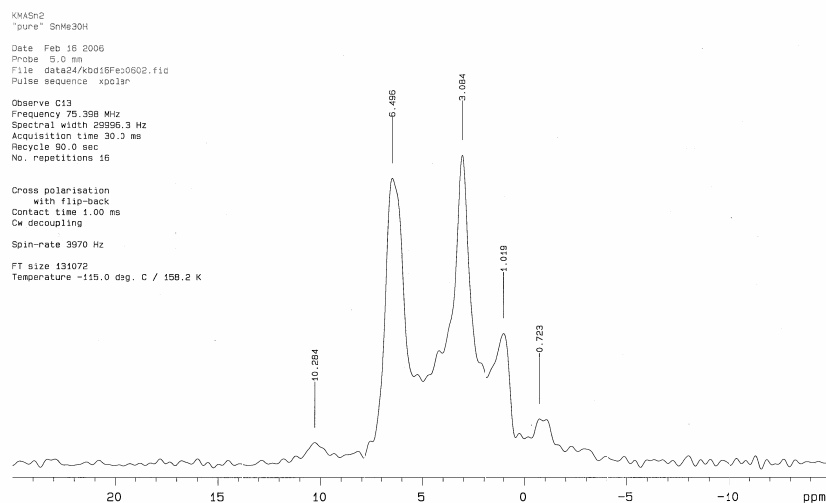

(c)

KMASn1  
 sublimed SnMe3OH  
 Date Feb 16 2006  
 Probe 4.0 mm  
 File data24/Abd16Fe20607.fid  
 Pulse sequence xpol3n  
 Observe C13  
 Frequency 75.398 MHz  
 Spectral width 30007.5 Hz  
 Acquisition time 30.3 ms  
 Recycle 30.0 sec  
 No. repetitions 88  
 Cross polarisation  
 with flip-back  
 Contact time 1.00 ms  
 Cw decoupling  
 Spin-rate 4010 Hz  
 FT size 32768  
 Temperature 25.0 deg. C / 298.1 K

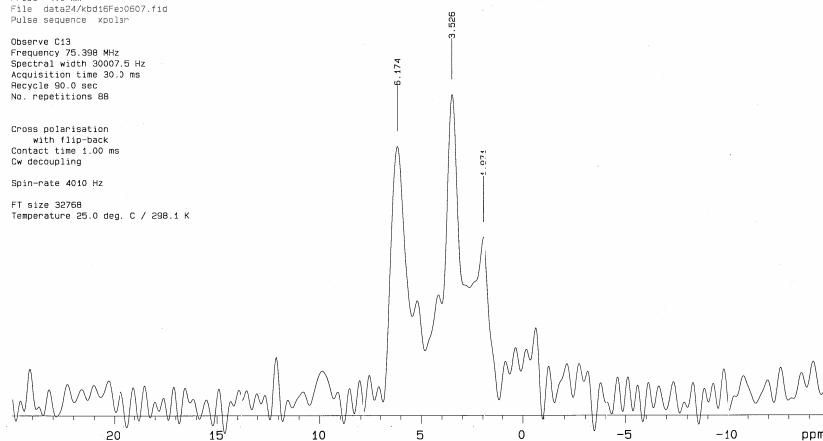

(d)

Figure S7 CP-MAS  $^{13}\text{C}$  NMR spectra for 'as received'  $\text{Me}_3\text{SnOH}$  at (a) 50  $^{\circ}\text{C}$ , (b) 25  $^{\circ}\text{C}$ , (c)  $-115^{\circ}\text{C}$  (d) sublimed  $\text{Me}_3\text{SnOH}$ , 25  $^{\circ}\text{C}$ .

(a)

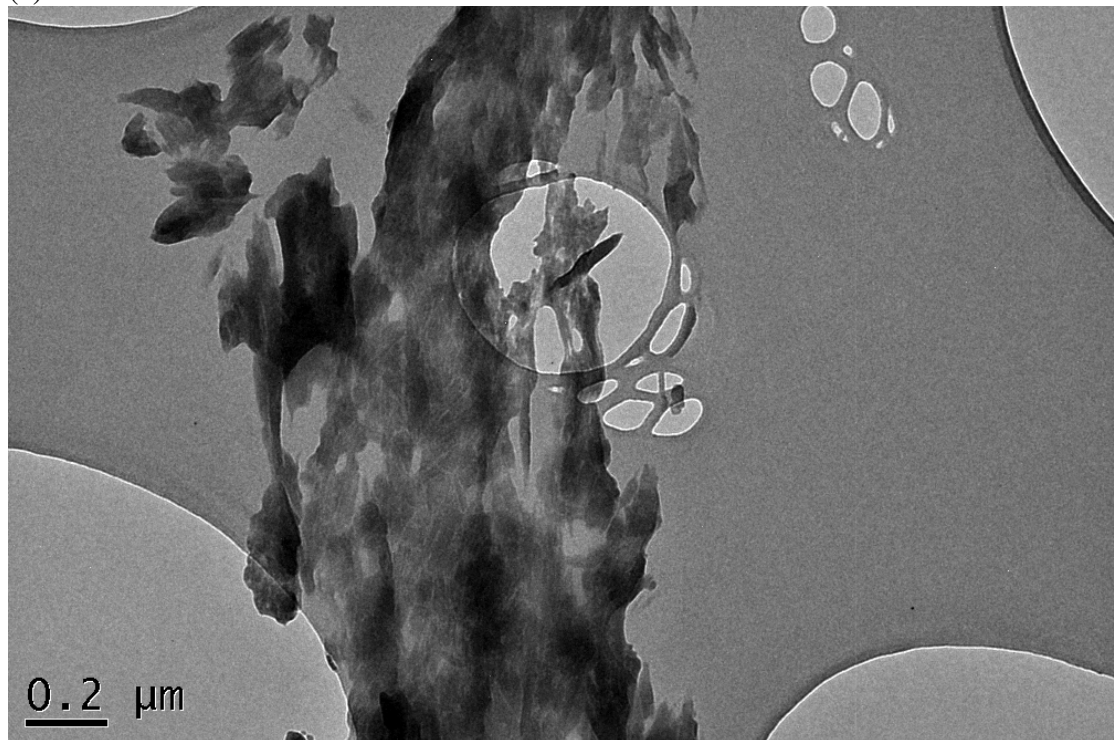

(b)

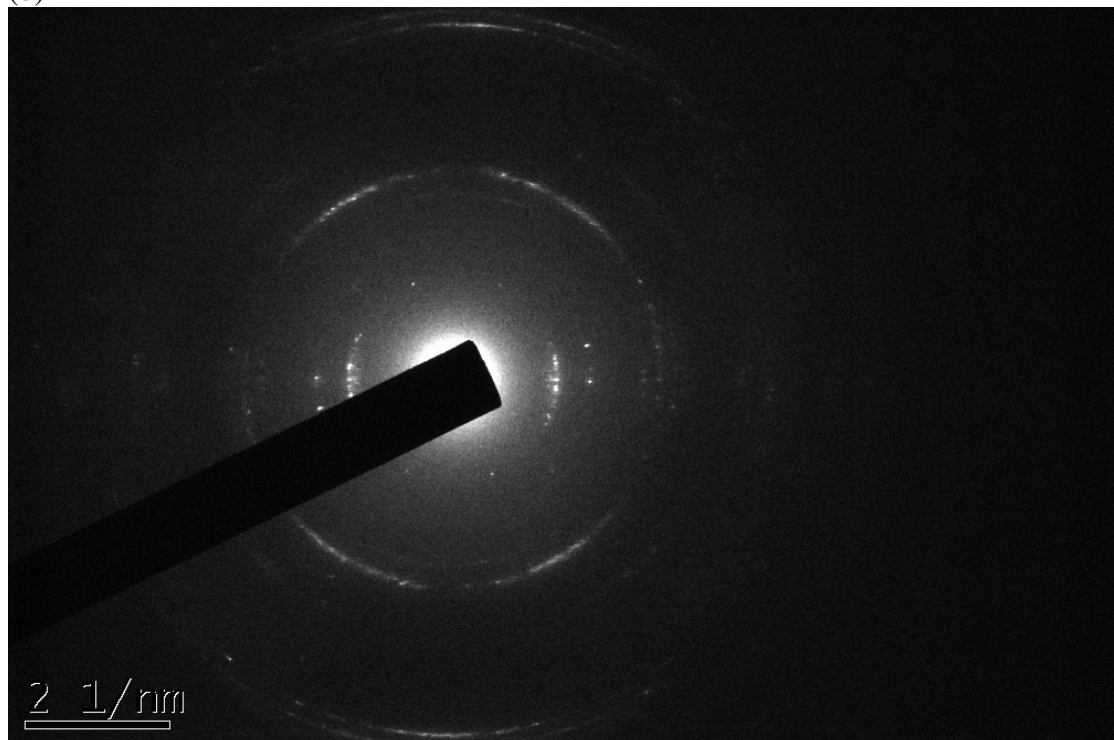

(c)

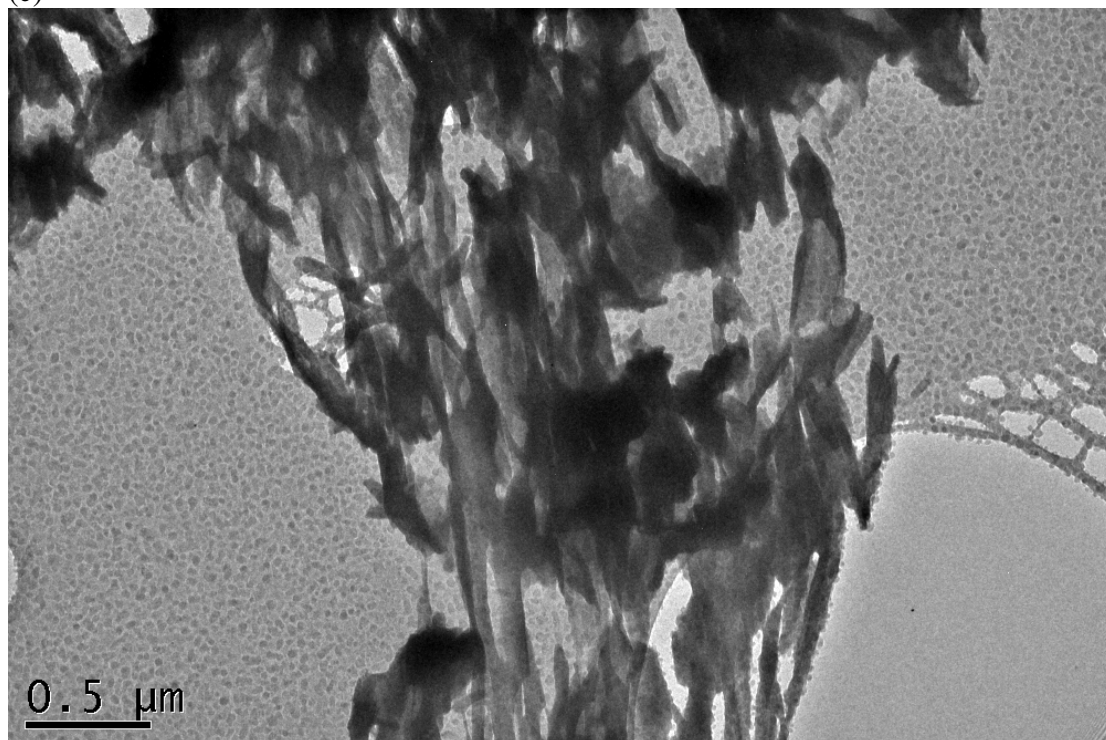

(d)

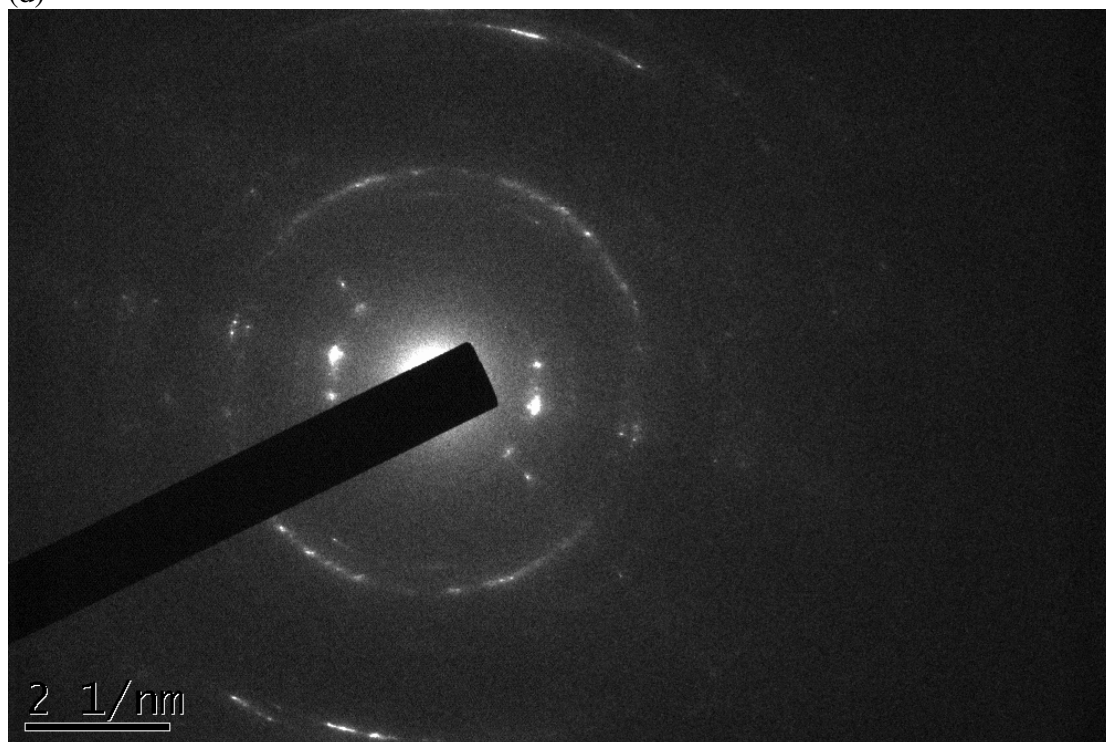

Figure S8 (a) and (b) TEM image and electron diffraction pattern of ‘as received’ SnMe<sub>3</sub>OH at -70 °C (c) and (d) TEM image and electron diffraction pattern of the same sample at -150 °C (granular features on the holey carbon grid are ice crystallites).
